# Supplementary material
Source: MDPI journal article supplement (https://www.mdpi.com/2071-1050/10/3/696)
Supplement: s1 [file s1]

**Rust scoring guide for silphium**

**Percent severity on leaves**

We use the leaf severity (percent of leaf area infected) scale (0-40%) in addition to the response (size and vigor of pustules) scale (0-4) and stem severity (percent of stem area infected) scale (0-40%) to monitor rust infection. The percent of the leaf area diseased was correlated with photosynthesis reduction and yield penalty.


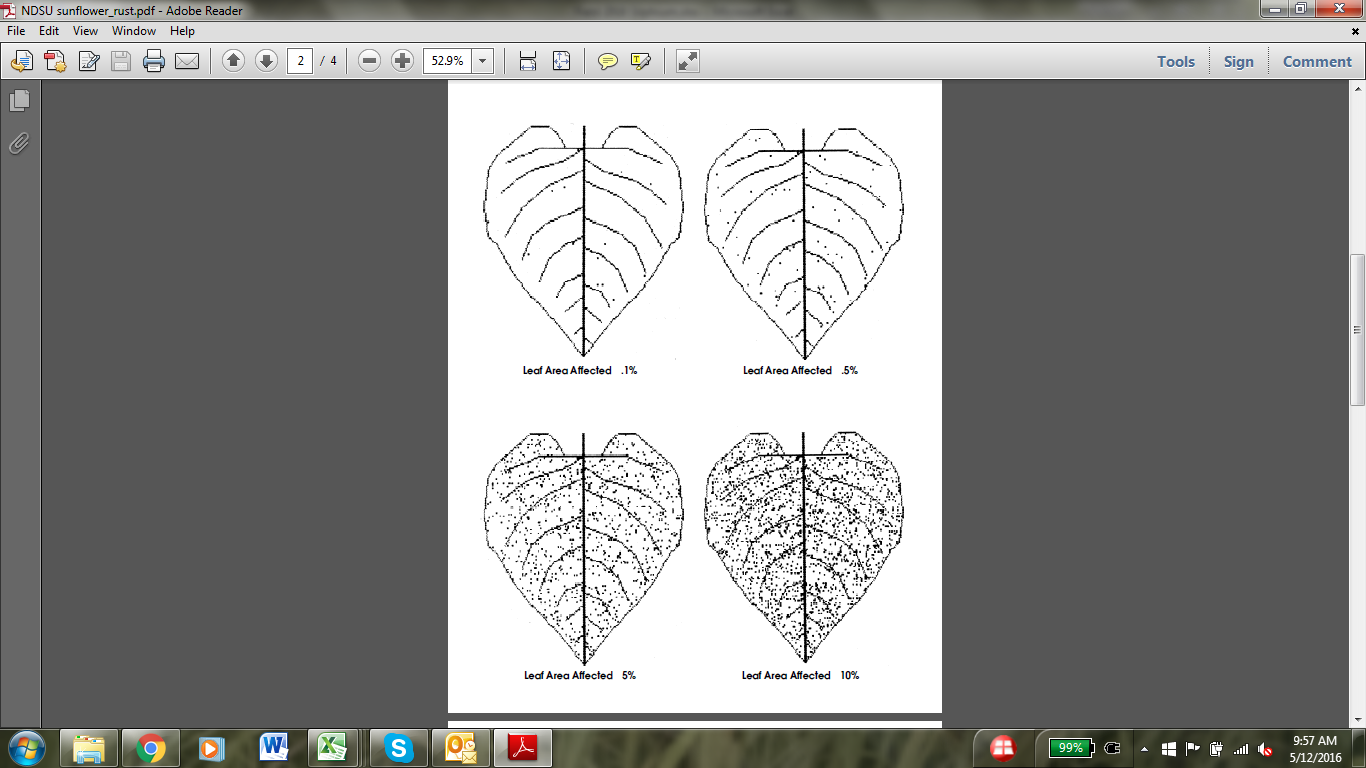

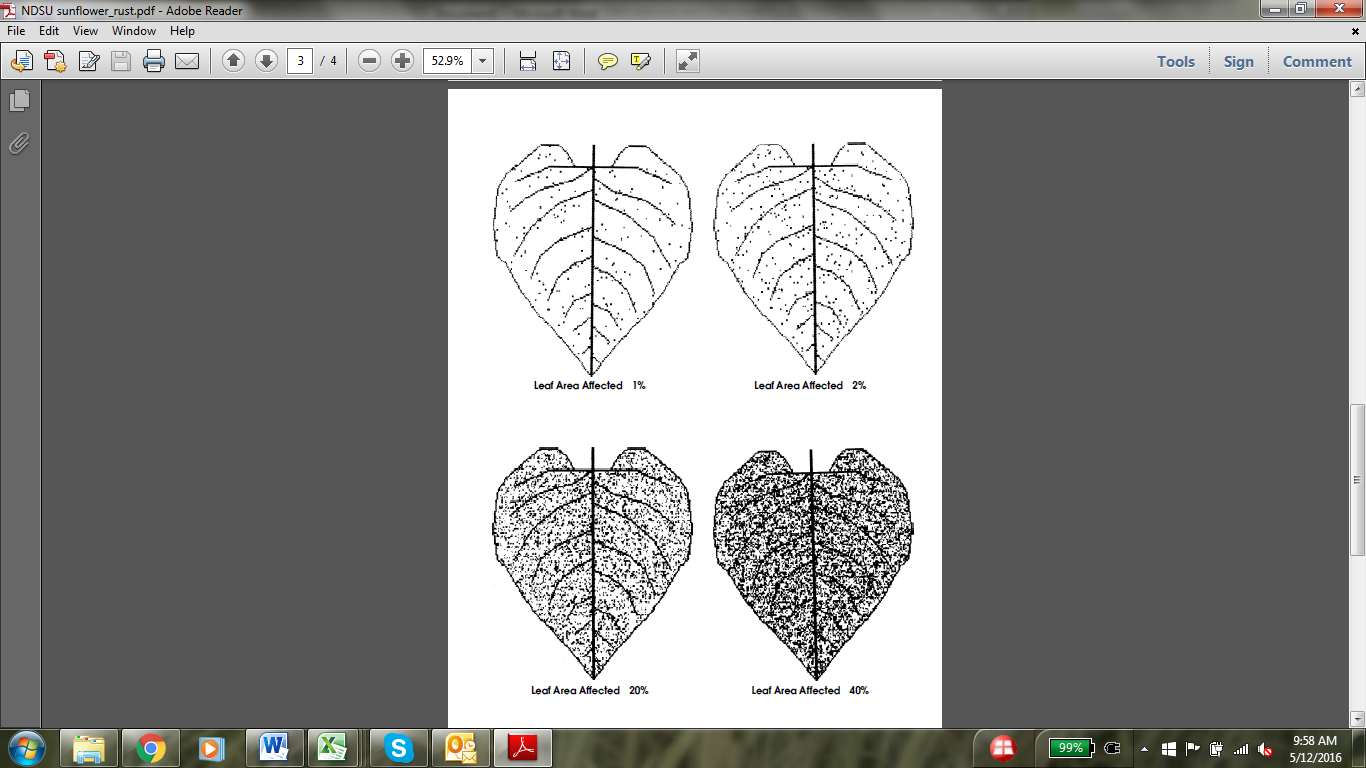


(developed by Gulya et al., 1990, NDSU Sunflower Rust)

**Percent severity on stems**

Stem infection may contribute to lodging and has been correlated with reduction in yield, likely through reducing the transfer of photosynthates to the developing heads and seed.

Note: There are many other causes of marking on the stems, including abrasions that leave brown scars and dark purple lesions caused by Alternaria (smooth, only slightly raised). Mature rust lesions caused by *P. silphii* are black, raised, and rough often with a brown circle in the center or at the margins. Immature lesions are bright orange often with rust colored flecks.

| Percent severity on stems | |
| --- | --- |
| 0.1 | 1-4 lesions on average per stem |
| 0.5 | 5-9 lesions on average per stem |
| 1 | 10-19 lesions on average per stem or ~1% of stem infected |
| 2 | ~20-40 lesions on average per stem, ~2% of stem infected |
| 5 | ~50 lesions on average per stem, ~5% of stem infected |
| 10 | ~100 lesions on average per stem, ~10 % of stem infected |
| 20 | ~20% of stem infected |
| 40 | ~40% of stem infected |

**Response type**

The response is a measure of the size of the lesions on a leaf. Some plants have localized brown necrotic tissue caused by rust, which could be a hypersensitive response and others have an immune response with no sign of infection, with no raised lesions and without active sporulation.

| Response type (adapted from Sackston, 1986) | |
| --- | --- |
| 0 | Immune, no telia produced |
| 0.5 | Highly resistant, producing brown necrotic lesions, no active sporulation |
| 1 | Resistant, producing very small telia |
| 2 | Moderately resistant, producing small telia |
| 3 | Moderately susceptible, producing medium-sized telia |
| 4 | Highly susceptible, producing large, vigorous telia growing together |

**Combined breeding scale** (single measure)

Lesions with no active sporulation (0 - .05)


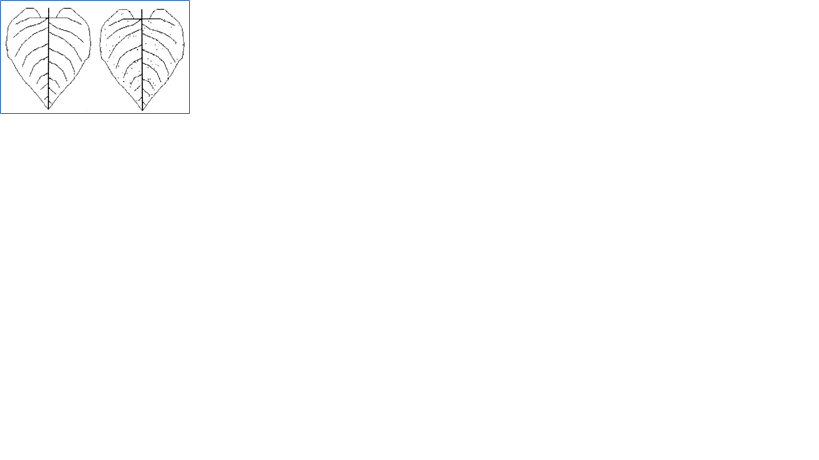

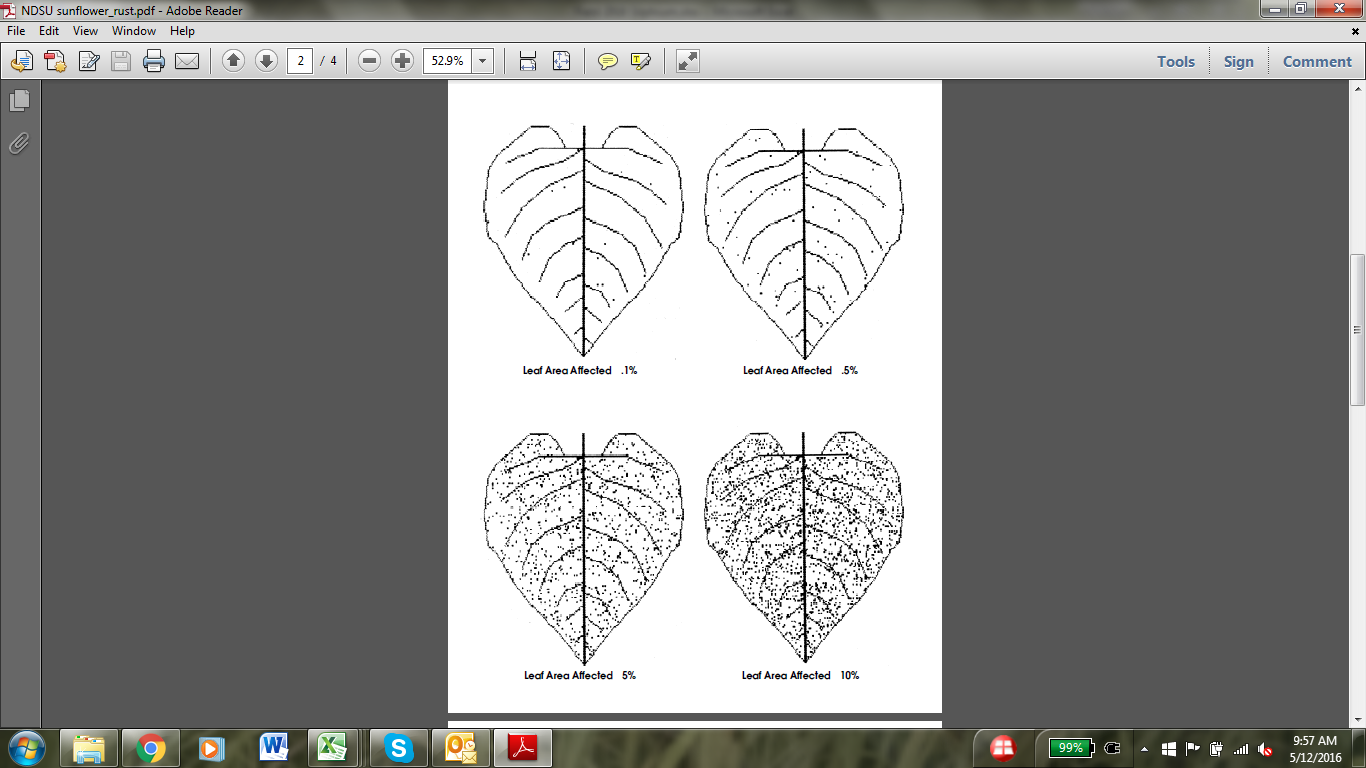

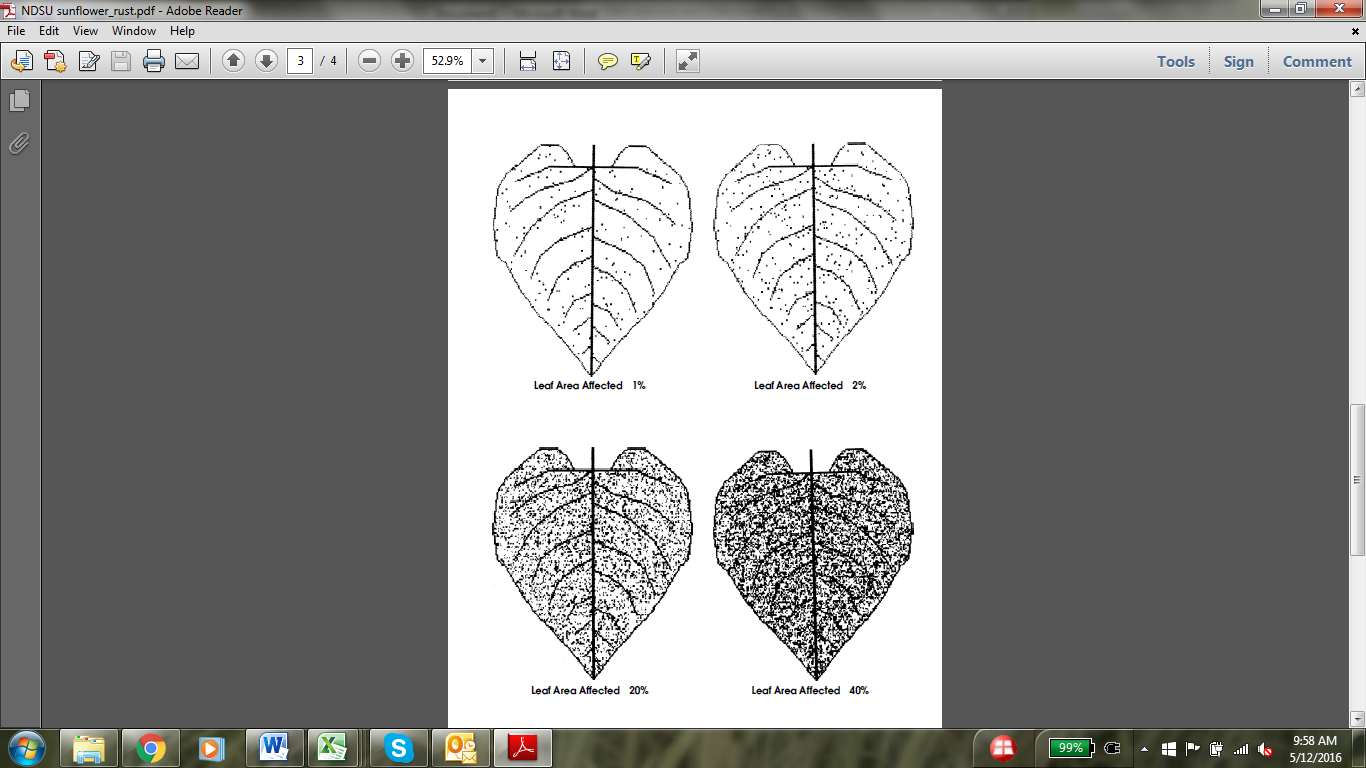

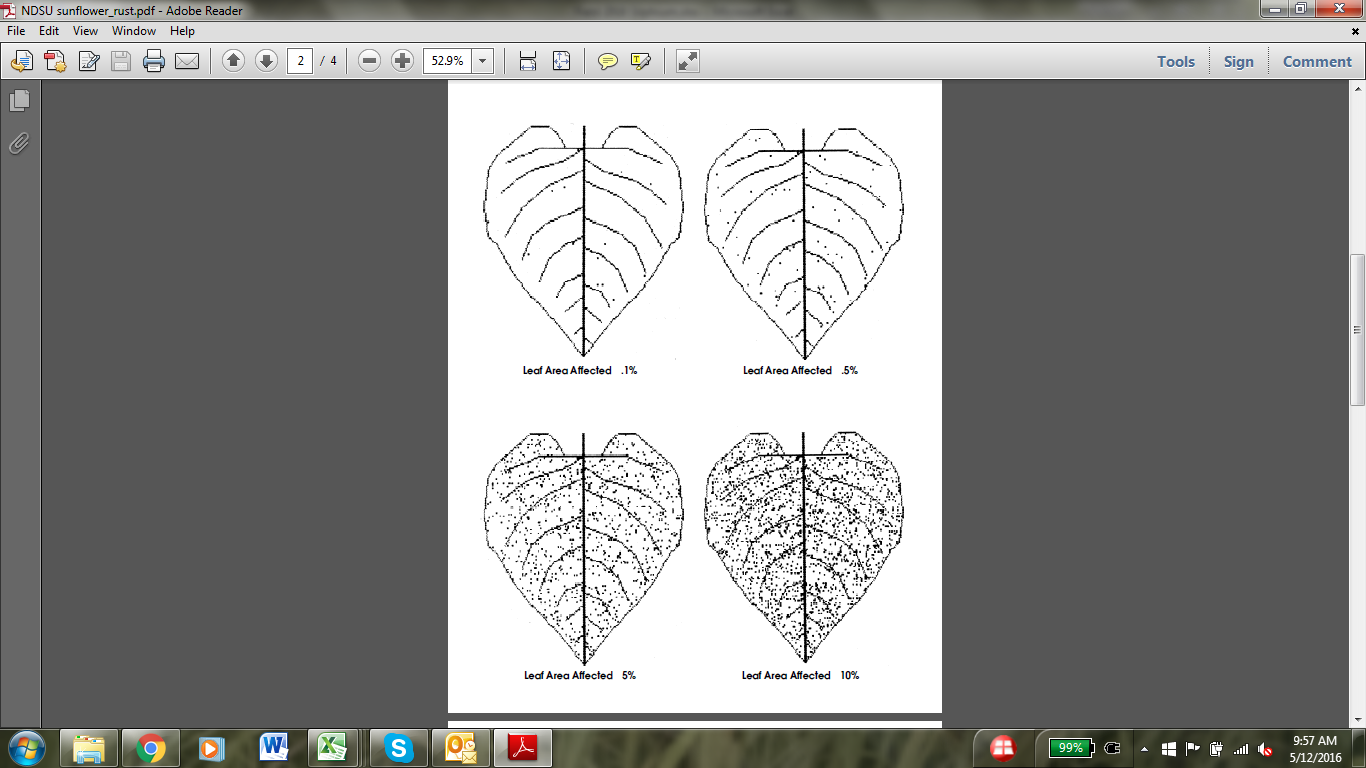


0 .001 .005 .01 .02 .05

Lesions with active sporulation (.1 – 40)


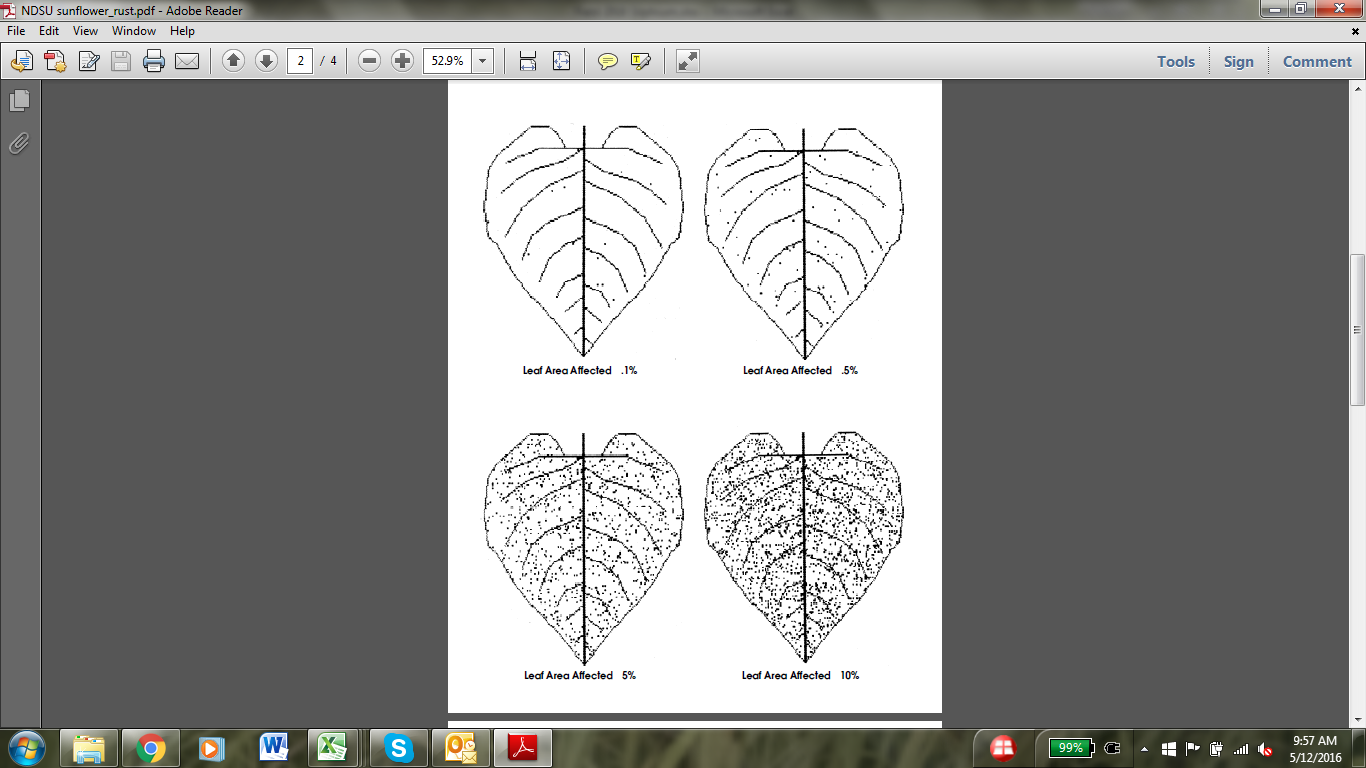

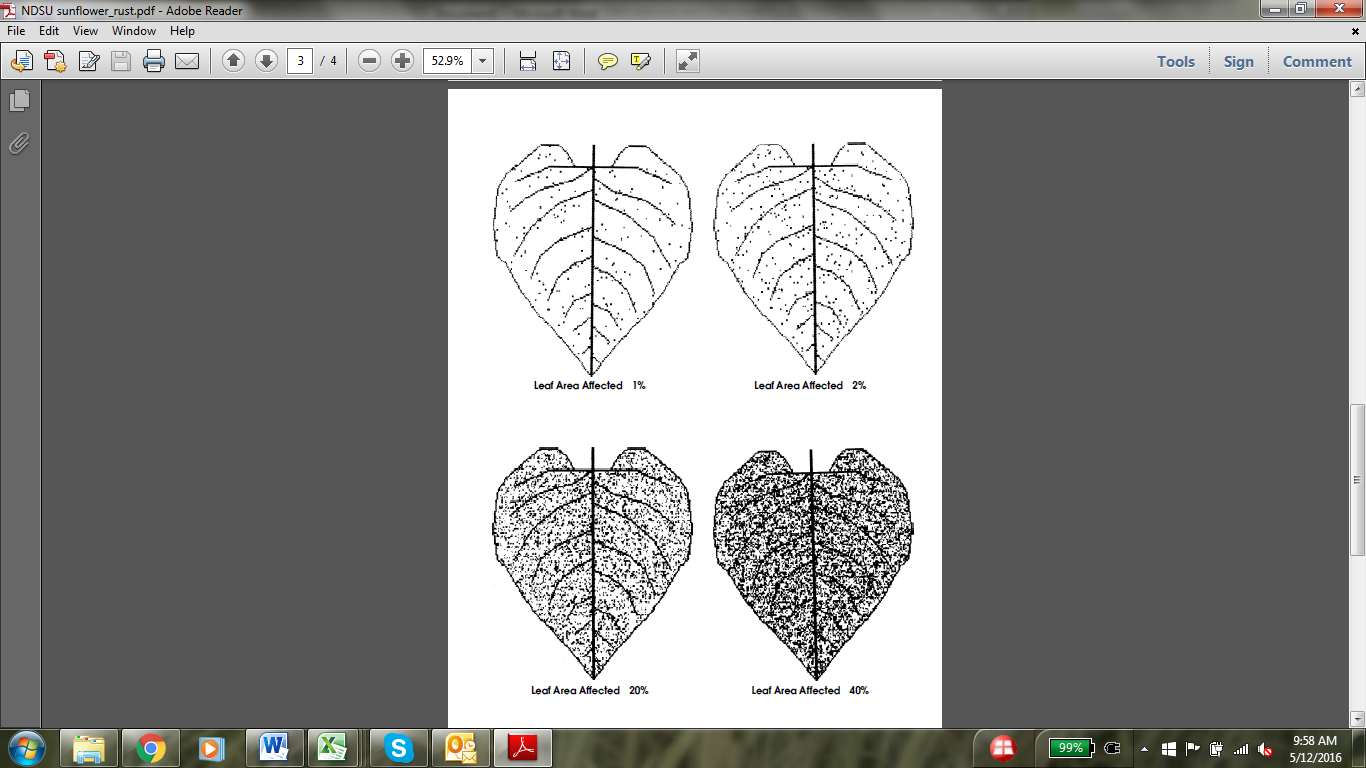


.1 .5 1 2


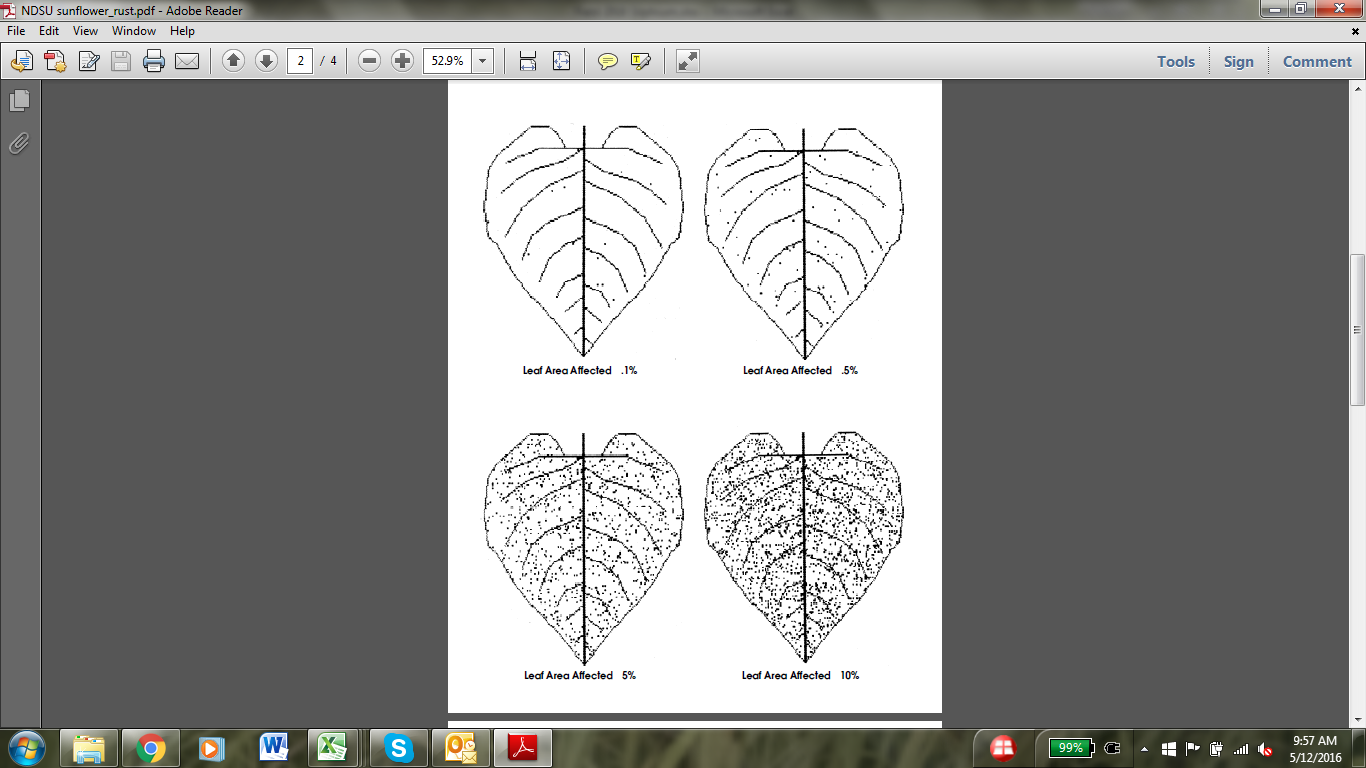

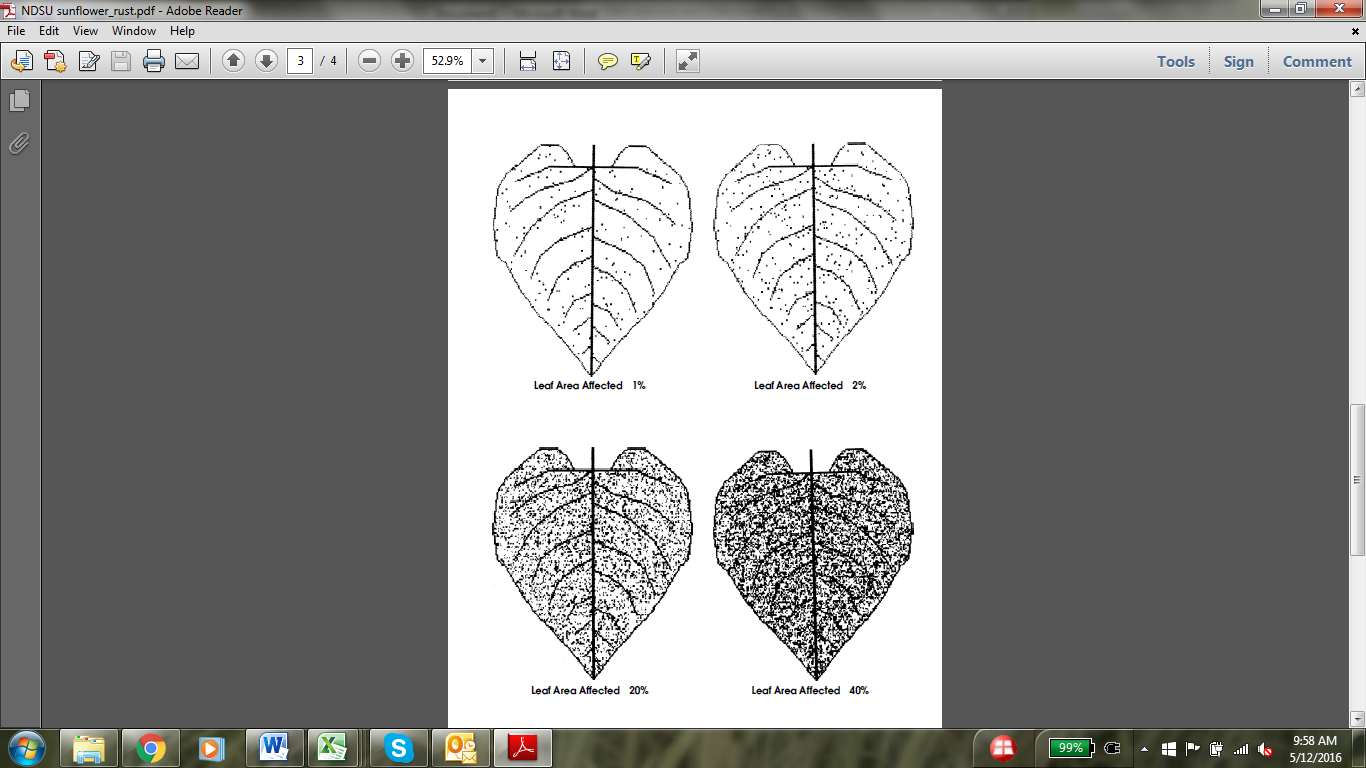


5 10 20 40

**Examples of rating scales in Silphium**

Stem severity


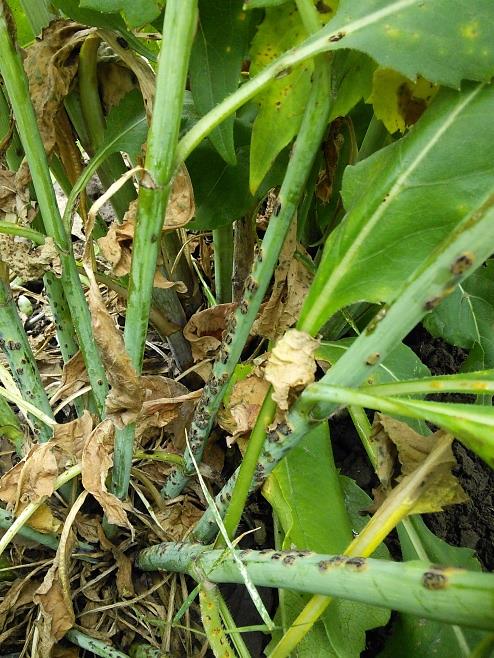

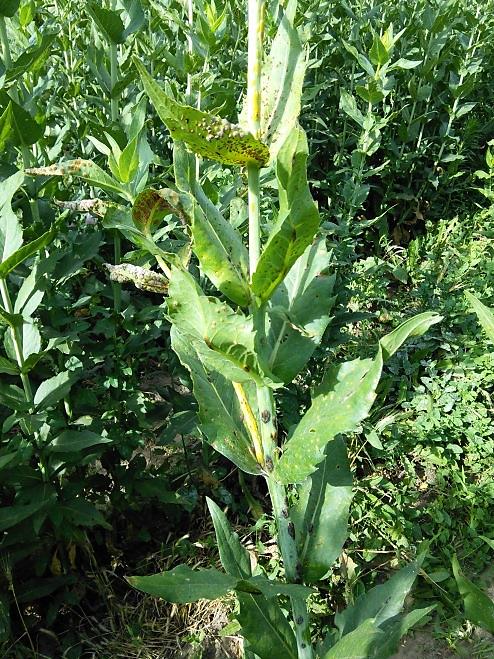

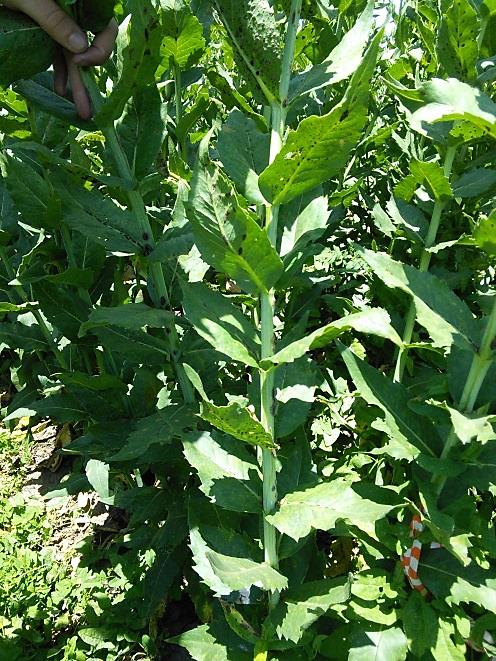

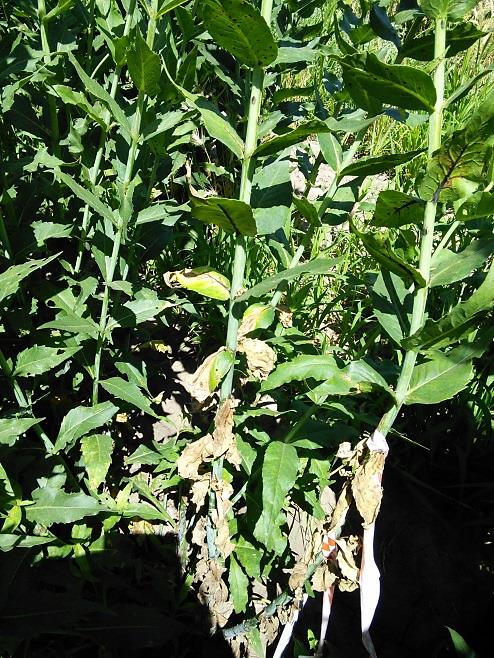


.1% .5% 2% 5%

(orange basidia also included) (entire stalk infected)

Leaf severity


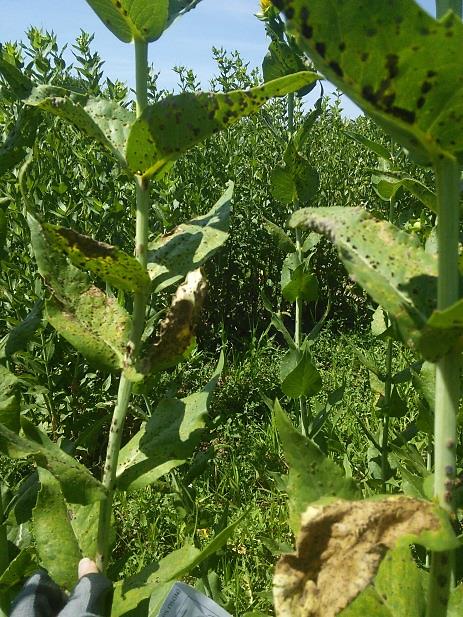

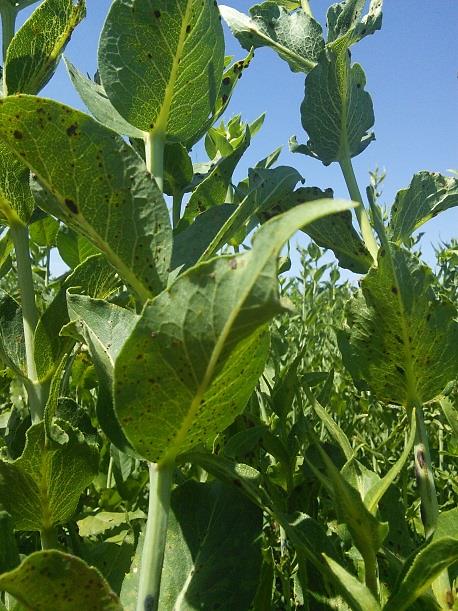

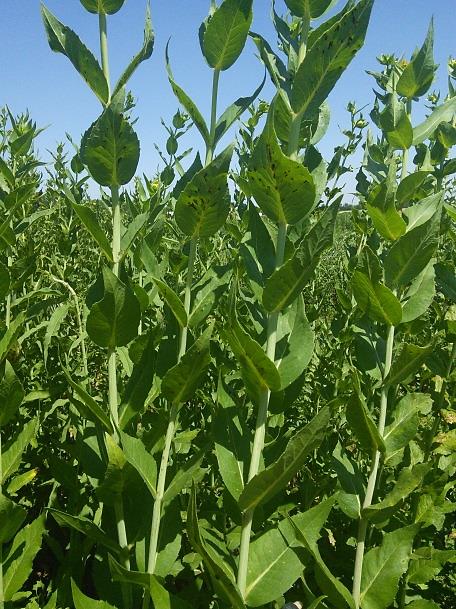

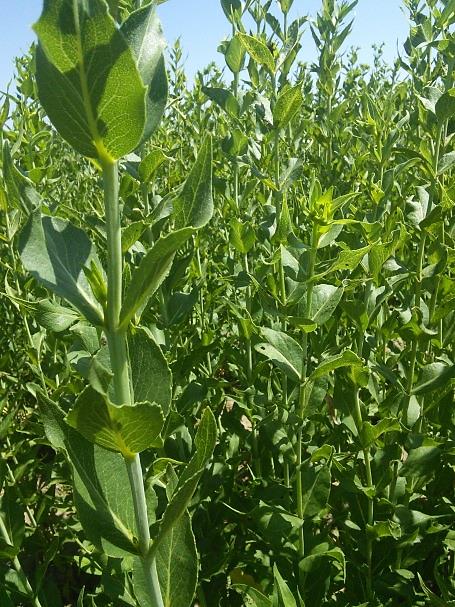


.1% .5% 1% 2%


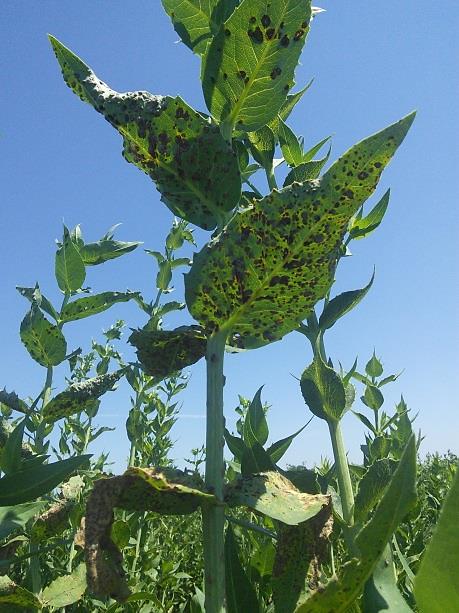

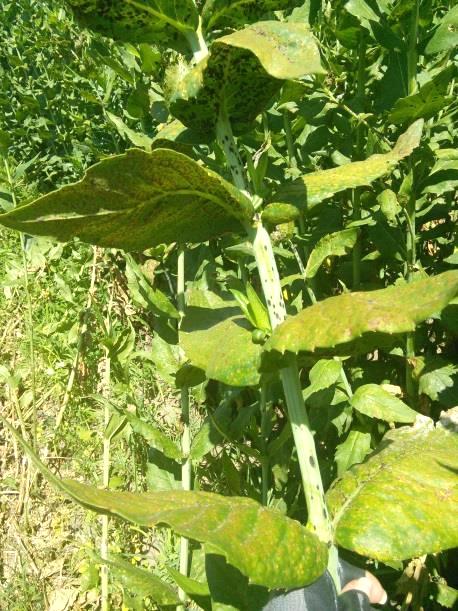


5% 10% (note: light orange basidia are visible)

Leaf response


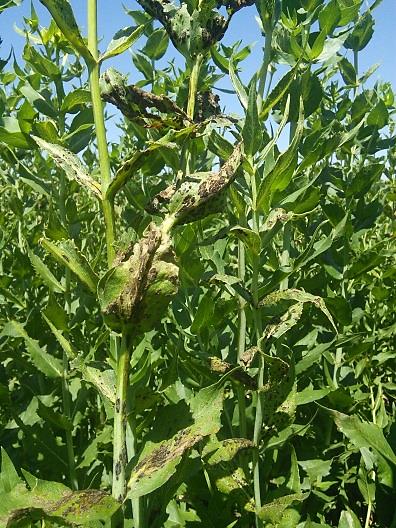

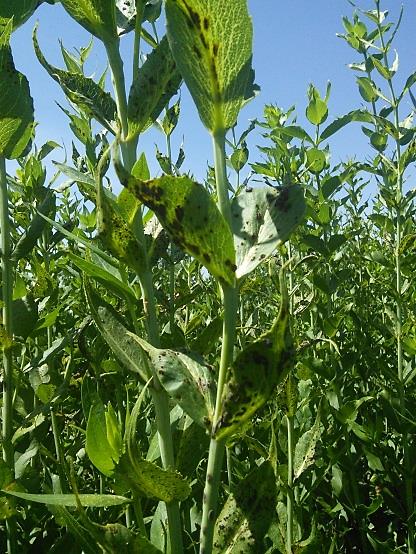

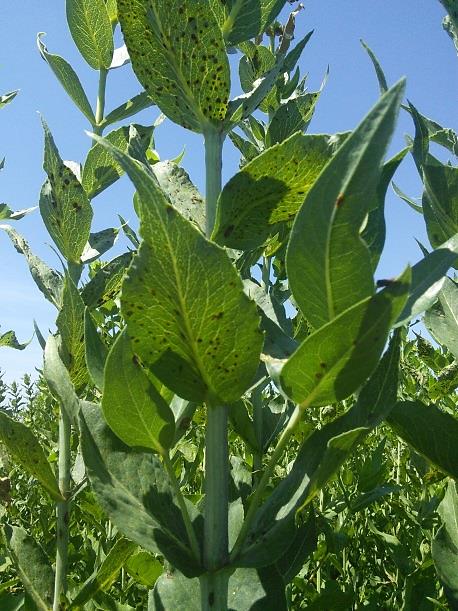

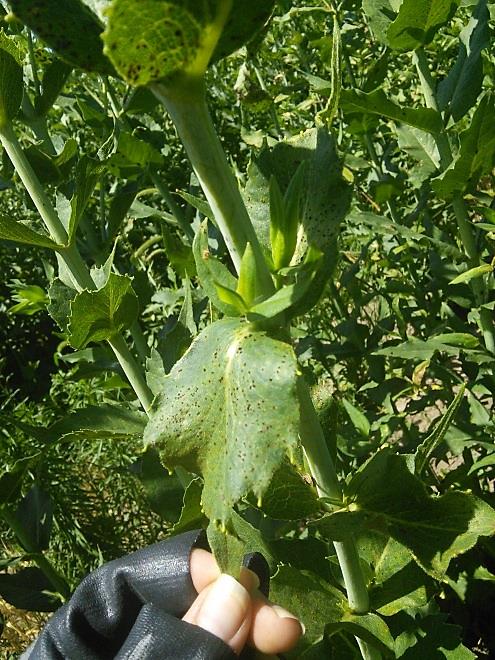

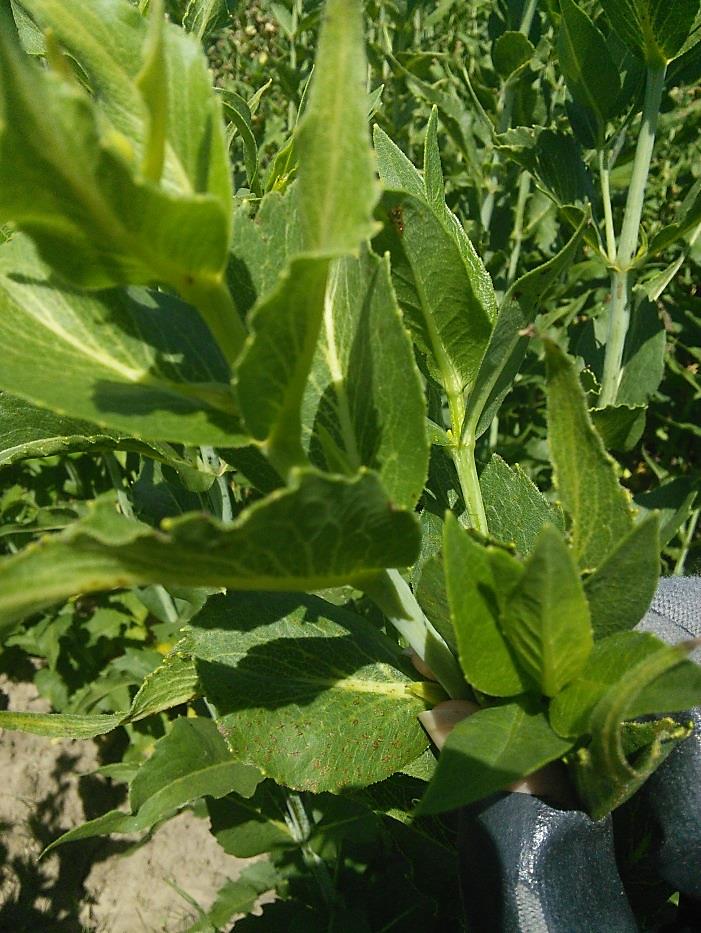


.5 1 2 3 4

References

Gulya, T.J., Venette, R., Venette, J.R. and Lameym H.A., 1990. Sunflower rust. NDSU. Extension service. Fargo. ND. USA. pp. 998.

Sackston, W.E. 1962. Studies on sunflower rust: III. Occurrence, distribution, and significance of races of Puccinia helianthi Schw. Can. J. Bot. 40(11): 1449–1458.
